# Supplementary material for: Clinical Juvenile Arthritis Disease Activity Score proves to be a useful tool in treat-to-target therapy in juvenile idiopathic arthritis
Source: PubMed Central journal article supplement — Ann Rheum Dis. 2017 Nov 14;77(3):336–42. doi: 10.1136/annrheumdis-2017-212104 (PMC5867401; doi:10.1136/annrheumdis-2017-212104), 2017-11-14
Supplement: annrheumdis-2017-212104supp003.pdf [file annrheumdis-2017-212104supp003.pdf]

## Supplementary File C

### JADAS71 and cJADAS71 as a prognostic test predicting failure to respond without escalation to anti-TNF

We calculated sensitivity, specificity and accuracy for various cut-off values for the JADAS and cJADAS as a prognostic test for treatment-failure for OJIA and PJIA at 3 and 6 months. We used cJADAS for OJIA and PJIA taken together, and separate for OJIA and PJIA. A lower relative contribution of the patient-VAS scores and correction ("no need to escalate") for a >50% decrease in cJADAS at 3 months compared to baseline was also analysed.

| <b>3 MONTHS</b>                                             | <b>ALL PATIENTS</b> |                    |            |                 | <b>OLIGOARTICULAR PATIENTS</b> |                    |            |                 | <b>POLYARTICULAR PATIENTS</b> |                    |            |                 |
|-------------------------------------------------------------|---------------------|--------------------|------------|-----------------|--------------------------------|--------------------|------------|-----------------|-------------------------------|--------------------|------------|-----------------|
| <b>Rule:<br/>Patient VAS can be up<br/>to 100% of score</b> | <b>Sensitivity</b>  | <b>Specificity</b> | <b>Sum</b> | <b>Accuracy</b> | <b>Sensitivity</b>             | <b>Specificity</b> | <b>Sum</b> | <b>Accuracy</b> | <b>Sensitivity</b>            | <b>Specificity</b> | <b>Sum</b> | <b>Accuracy</b> |
| JADAS71 >4                                                  | 81.8%               | 36.2%              | 118.0      | 50.7%           | 83.3%                          | 47.1%              | 130.4      | 56.5%           | 81.3%                         | 30.0%              | 111.3      | 47.8%           |
| JADAS71 >5                                                  | 81.8%               | 53.5%              | 135.3      | 63.1%           | 83.3%                          | 68.8%              | 152.1      | 72.7%           | 81.3%                         | 44.4%              | 125.7      | 58.1%           |
| JADAS71 >6                                                  | 71.4%               | 58.5%              | 129.9      | 62.9%           | 40.0%                          | 73.3%              | 113.3      | 65.0%           | 81.3%                         | 50.0%              | 131.3      | 61.9%           |
| JADAS71 >7                                                  | 71.4%               | 76.9%              | 148.3      | 75.0%           | 40.0%                          | 85.7%              | 125.7      | 73.7%           | 81.3%                         | 72.0%              | 153.3      | 75.6%           |
| JADAS71 >8                                                  | 66.7%               | 82.1%              | 148.8      | 76.7%           | 40.0%                          | 92.9%              | 132.9      | 78.9%           | 75.0%                         | 76.0%              | 151.0      | 75.6%           |
| JADAS71 >9                                                  | 57.1%               | 94.7%              | 151.8      | 81.4%           | 40.0%                          | 100.0%             | 140.0      | 84.2%           | 62.5%                         | 91.7%              | 154.2      | 80.0%           |
| JADAS71 >10                                                 | 38.1%               | 94.7%              | 132.8      | 74.6%           | 20.0%                          | 100.0%             | 120.0      | 78.9%           | 43.8%                         | 91.7%              | 135.5      | 72.5%           |
| cJADAS >4                                                   | 78.3%               | 39.6%              | 117.9      | 52.1%           | 71.4%                          | 55.6%              | 127.0      | 20.0%           | 81.3%                         | 30.0%              | 111.3      | 47.8%           |
| cJADAS >5                                                   | 78.3%               | 54.5%              | 132.8      | 62.7%           | 71.4%                          | 70.6%              | 142.0      | 70.8%           | 81.3%                         | 44.4%              | 125.7      | 58.1%           |
| cJADAS >6                                                   | 68.2%               | 64.3%              | 132.5      | 65.6%           | 33.3%                          | 81.3%              | 114.6      | 68.2%           | 81.3%                         | 53.8%              | 135.1      | 64.3%           |
| cJADAS >7                                                   | 68.2%               | 78.0%              | 146.2      | 74.6%           | 33.3%                          | 87.5%              | 120.8      | 72.7%           | 81.3%                         | 72.0%              | 153.3      | 75.6%           |
| cJADAS >8                                                   | 61.9%               | 82.9%              | 144.8      | 75.8%           | 33.3%                          | 93.8%              | 127.1      | 77.3%           | 73.3%                         | 76.0%              | 149.3      | 75.0%           |
| cJADAS >9                                                   | -                   | -                  | -          | -               | -                              | -                  | -          | -               | 46.7%                         | 91.7%              | 138.4      | 74.4%           |
| cJADAS >4 unless cJADAS<br>3 months <50% baseline*          | 46.7%               | 75.9%              | 122.6      | 65.5%           | 50.0%                          | 80.0%              | 130.0      | 70.0%           | 45.0%                         | 73.5%              | 118.5      | 63.0%           |
| cJADAS >5 unless cJADAS<br>3 months <50% baseline*          | 46.7%               | 82.4%              | 129.1      | 69.1%           | 50.0%                          | 84.2%              | 134.2      | 72.4%           | 45.0%                         | 81.3%              | 126.3      | 67.3%           |
| cJADAS >6 unless cJADAS<br>3 months <50% baseline*          | 37.9%               | 85.7%              | 123.6      | 67.9%           | 22.2%                          | 88.9%              | 111.1      | 66.7%           | 45.0%                         | 83.9%              | 128.9      | 68.6%           |
| cJADAS >7 unless cJADAS<br>3 months <50% baseline*          | 37.9%               | 89.6%              | 127.5      | 70.1%           | 22.2%                          | 94.4%              | 116.6      | 70.4%           | 45.0%                         | 86.7%              | 131.7      | 70.0%           |
| cJADAS >8 unless cJADAS<br>3 months <50% baseline*          | 34.5%               | 91.7%              | 126.2      | 70.1%           | 22.2%                          | 100%               | 122.2      | 74.1%           | 40.0%                         | 86.7%              | 126.7      | 68.0%           |

| 3 MONTHS                                                   | ALL PATIENTS |             |       |          | OLIGOARTICULAR PATIENTS |             |       |          | POLYARTICULAR PATIENTS |             |       |          |
|------------------------------------------------------------|--------------|-------------|-------|----------|-------------------------|-------------|-------|----------|------------------------|-------------|-------|----------|
| <b>Rule: Patient VAS at most 50% of score</b>              | Sensitivity  | Specificity | Sum   | Accuracy | Sensitivity             | Specificity | Sum   | Accuracy | Sensitivity            | Specificity | Sum   | Accuracy |
| cJADAS >4                                                  | 56.7%        | 53.1%       | 109.8 | 54.4%    | 40.0%                   | 68.4%       | 108.4 | 58.6%    | 65.0%                  | 43.3%       | 108.3 | 52.0%    |
| cJADAS >5                                                  | 56.7%        | 66.0%       | 122.7 | 62.3%    | 40.0%                   | 78.9%       | 118.9 | 65.5%    | 65.0%                  | 57.1%       | 122.1 | 60.4%    |
| cJADAS >6                                                  | 48.3%        | 77.1%       | 125.4 | 66.2%    | 22.2%                   | 94.7%       | 116.9 | 71.4%    | 60.0%                  | 65.5%       | 125.5 | 63.3%    |
| cJADAS >7                                                  | 48.3%        | 84.0%       | 132.3 | 70.9%    | 22.2%                   | 95.0%       | 117.2 | 72.4%    | 60.0%                  | 76.7%       | 136.7 | 70.0%    |
| cJADAS >8                                                  | 42.9%        | 90.4%       | 133.3 | 73.8%    | 22.2%                   | 100%        | 122.2 | 76.7%    | 52.6%                  | 83.9%       | 136.5 | 72.0%    |
| cJADAS >4 unless cJADAS 3 months <50% baseline*            | 43.3%        | 75.9%       | 119.2 | 64.3%    | 40.0%                   | 80.0%       | 120.0 | 66.7%    | 45.0%                  | 73.5%       | 118.5 | 63.0%    |
| cJADAS >5 unless cJADAS 3 months <50% baseline*            | 43.3%        | 82.7%       | 126.0 | 68.3%    | 40.0%                   | 85.0%       | 125.0 | 70.0%    | 45.0%                  | 81.3%       | 126.3 | 67.3%    |
| cJADAS >6 unless cJADAS 3 months <50% baseline*            | 37.9%        | 88.2%       | 126.1 | 70.0%    | 22.2%                   | 94.7%       | 116.9 | 71.4%    | 45.0%                  | 84.4%       | 129.4 | 69.2%    |
| cJADAS >7 unless cJADAS 3 months <50% baseline*            | 37.9%        | 90.4%       | 128.3 | 71.6%    | 22.2%                   | 95.0%       | 117.2 | 72.4%    | 45.0%                  | 87.5%       | 132.5 | 71.1%    |
| cJADAS >8 unless cJADAS 3 months <50% baseline*            | 34.5%        | 92.5%       | 127.0 | 72.0%    | 22.2%                   | 100%        | 122.2 | 76.7%    | 40.0%                  | 87.5%       | 127.5 | 69.2%    |
| <b>Patient VAS at most 0% of score (i.e. just PGA+AJC)</b> |              |             |       |          |                         |             |       |          |                        |             |       |          |
| PGA+AJC >3                                                 | 53.3%        | 57.6%       | 110.9 | 56.2%    | 40.0%                   | 78.3%       | 118.3 | 66.7%    | 60.0%                  | 44.4%       | 104.4 | 50.0%    |
| PGA+AJC >4                                                 | 50.0%        | 72.9%       | 122.9 | 65.2%    | 30.0%                   | 87.0%       | 117.0 | 69.7%    | 60.0%                  | 63.9%       | 123.9 | 62.5%    |
| PGA+AJC >5                                                 | 46.7%        | 86.4%       | 133.1 | 73.0%    | 20.0%                   | 91.3%       | 111.3 | 69.7%    | 60.0%                  | 83.3%       | 143.3 | 75.0%    |
| PGA+AJC >6                                                 | 36.7%        | 89.8%       | 126.5 | 71.9%    | 0.0%                    | 95.7%       | 95.7  | 66.7%    | 55.0%                  | 86.1%       | 141.1 | 75.0%    |
| PGA+AJC >7                                                 | 30.0%        | 93.2%       | 123.2 | 71.9%    | 0.0%                    | 100%        | 100.0 | 69.7%    | 45.0%                  | 88.9%       | 133.9 | 73.2%    |
| PGA+AJC >3 unless PGA+AJC 3 months <50% baseline           | 46.7%        | 71.2%       | 117.9 | 62.9%    | 40.0%                   | 78.3%       | 118.3 | 66.7%    | 50.0%                  | 66.7%       | 116.7 | 60.7%    |
| PGA+AJC >4 unless PGA+AJC 3 months <50% baseline           | 43.3%        | 79.7%       | 123.0 | 67.4%    | 30.0%                   | 87.0%       | 117.0 | 69.7%    | 50.0%                  | 75.0%       | 125.0 | 66.1%    |
| PGA+AJC >5 unless PGA+AJC 3 months <50% baseline           | 40.0%        | 88.1%       | 128.1 | 71.9%    | 20.0%                   | 91.3%       | 111.3 | 69.7%    | 50.0%                  | 86.1%       | 136.1 | 73.2%    |
| PGA+AJC >6 unless PGA+AJC 3 months <50% baseline           | 30.0%        | 91.5%       | 121.5 | 70.8%    | 0.0%                    | 95.7%       | 95.7  | 66.7%    | 45.0%                  | 88.9%       | 133.9 | 73.2%    |
| PGA+AJC >7 unless PGA+AJC 3 months <50% baseline           | 23.3%        | 94.9%       | 118.2 | 70.8%    | 0.0%                    | 100%        | 100.0 | 69.7%    | 35.0%                  | 91.7%       | 126.7 | 71.4%    |
| PGA+AJC >8 unless PGA+AJC 3 months <50% baseline           | 16.7%        | 94.9%       | 111.6 | 68.5%    | 0.0%                    | 100%        | 100.0 | 69.7%    | 25.0%                  | 91.7%       | 116.7 | 67.9%    |
| <b>Other rules</b>                                         |              |             |       |          |                         |             |       |          |                        |             |       |          |
| cJADAS 3 months >50% baseline*                             | 78.9%        | 50%         | 128.9 | 58.5%    | 100%                    | 47.4%       | 147.4 | 58.3%    | 71.4%                  | 51.9%       | 123.3 | 58.5%    |
| PGA+AJC 3 months >50% baseline                             | 46.7%        | 64.4%       | 111.1 | 58.4%    | 50.0%                   | 60.9%       | 110.9 | 57.6%    | 45.0%                  | 66.7%       | 111.7 | 58.9%    |

\* Or just PGA+AJC <50% baseline in case of missing VAS

| 6 MONTHS                                                     | ALL PATIENTS |             |       |          | OLIGOARTICULAR PATIENTS |             |       |          | POLYARTICULAR PATIENTS |             |       |          |
|--------------------------------------------------------------|--------------|-------------|-------|----------|-------------------------|-------------|-------|----------|------------------------|-------------|-------|----------|
| <b>Rule: Patient VAS can be up to 100% of score</b>          | Sensitivity  | Specificity | Sum   | Accuracy | Sensitivity             | Specificity | Sum   | Accuracy | Sensitivity            | Specificity | Sum   | Accuracy |
| JADAS71 >2                                                   | 82.6%        | 40.0%       | 122.6 | 53.3%    | 100.0%                  | 45.5%       | 145.5 | 58.6%    | 75.0%                  | 36.7%       | 111.7 | 50.0%    |
| JADAS71 >3                                                   | 78.3%        | 58.0%       | 136.3 | 64.4%    | 100.0%                  | 52.4%       | 152.4 | 64.2%    | 68.8%                  | 62.1%       | 130.9 | 64.4%    |
| JADAS71 >4                                                   | 68.2%        | 74.0%       | 142.2 | 72.2%    | 66.7%                   | 71.4%       | 138.1 | 70.4%    | 68.8%                  | 75.9%       | 144.7 | 73.3%    |
| JADAS71 >5                                                   | 57.1%        | 79.2%       | 136.3 | 72.5%    | 66.7%                   | 76.2%       | 142.9 | 74.0%    | 53.3%                  | 81.5%       | 134.8 | 71.4%    |
| JADAS71 >6                                                   | 50.0%        | 85.4%       | 135.4 | 75.0%    | 40.0%                   | 85.7%       | 125.7 | 76.9%    | 53.3%                  | 85.2%       | 138.5 | 73.8%    |
| JADAS71 >7                                                   | 31.6%        | 87.5%       | 119.1 | 71.6%    | 0%                      | 85.7%       | 85.7  | 72.0%    | 40.0%                  | 88.9%       | 128.9 | 71.4%    |
| JADAS71 >8                                                   | 31.6%        | 89.6%       | 121.2 | 73.1%    | 0%                      | 85.7%       | 85.7  | 72.0%    | 40.0%                  | 92.6%       | 132.6 | 73.8%    |
| cJADAS >2                                                    | 83.3%        | 42.3%       | 125.6 | 55.3%    | 100%                    | 50.0%       | 150.0 | 62.1%    | 76.5%                  | 36.7%       | 113.2 | 51.1%    |
| cJADAS >3                                                    | 79.2%        | 61.2%       | 140.4 | 67.1%    | 100%                    | 57.1%       | 157.1 | 67.9%    | 70.6%                  | 64.3%       | 134.9 | 66.7%    |
| cJADAS >4                                                    | 69.6%        | 75.5%       | 145.1 | 73.6%    | 66.7%                   | 71.4%       | 138.1 | 70.4%    | 70.6%                  | 78.6%       | 149.2 | 75.6%    |
| cJADAS >5                                                    | 59.1%        | 79.2%       | 138.3 | 72.9%    | 66.7%                   | 76.2%       | 142.9 | 74.1%    | 56.3%                  | 81.5%       | 137.8 | 72.1%    |
| cJADAS >6                                                    | 52.4%        | 85.4%       | 137.8 | 75.4%    | 40.0%                   | 85.7%       | 125.7 | 76.9%    | 56.3%                  | 85.2%       | 141.5 | 74.4%    |
| cJADAS >7                                                    | 35.0%        | 89.6%       | 124.6 | 73.5%    | 0.0%                    | 85.7%       | 85.7  | 72.0%    | 43.8%                  | 92.6%       | 136.4 | 74.4%    |
| <b>Patient VAS at most 50% of score</b>                      |              |             |       |          |                         |             |       |          |                        |             |       |          |
| cJADAS >2                                                    | 69.2%        | 58.6%       | 127.8 | 61.9%    | 66.7%                   | 69.6%       | 136.3 | 68.8%    | 70.6%                  | 51.4%       | 122.0 | 57.7%    |
| cJADAS >3                                                    | 59.3%        | 76.4%       | 135.7 | 70.7%    | 55.6%                   | 77.3%       | 132.9 | 71.0%    | 61.1%                  | 75.8%       | 136.9 | 70.6%    |
| cJADAS >4                                                    | 50.0%        | 83.9%       | 133.9 | 73.2%    | 25.0%                   | 86.4%       | 111.4 | 70.0%    | 61.1%                  | 82.4%       | 143.5 | 75.0%    |
| cJADAS >5                                                    | 40.0%        | 85.7%       | 125.7 | 71.6%    | 25.0%                   | 86.4%       | 111.4 | 70.0%    | 47.1%                  | 85.3%       | 132.4 | 72.5%    |
| cJADAS >6                                                    | 37.5%        | 89.7%       | 127.2 | 74.4%    | 14.3%                   | 91.3%       | 105.6 | 73.3%    | 47.1%                  | 88.6%       | 135.7 | 75.0%    |
| cJADAS >7                                                    | 25.0%        | 93.1%       | 118.1 | 73.2%    | 0.0%                    | 91.3%       | 91.3  | 70.0%    | 35.3%                  | 94.3%       | 129.6 | 75.0%    |
| <b>Patient VAS at most 0% of score (i.e. just PGA + AJC)</b> |              |             |       |          |                         |             |       |          |                        |             |       |          |
| PGA+AJC >2                                                   | 55.6%        | 69.5%       | 115.1 | 65.1%    | 44.4%                   | 73.9%       | 138.3 | 65.6%    | 61.1%                  | 66.7%       | 127.8 | 64.8%    |
| PGA+AJC >3                                                   | 51.9%        | 83.1%       | 135.0 | 73.2%    | 33.3%                   | 87.0%       | 120.0 | 71.9%    | 61.1%                  | 80.6%       | 141.7 | 74.1%    |
| PGA+AJC >4                                                   | 37.0%        | 88.1%       | 125.1 | 72.1%    | 22.2%                   | 91.3%       | 113.5 | 71.9%    | 44.4%                  | 86.1%       | 130.5 | 72.2%    |
| PGA+AJC >5                                                   | 22.2%        | 93.2%       | 115.4 | 70.9%    | 22.2%                   | 91.3%       | 113.5 | 71.9%    | 22.2%                  | 94.4%       | 116.6 | 70.4%    |
